# Supplementary material for: A bulk photovoltaic effect in a zero-dimensional room-temperature molecular ferroelectric [C8N2H22]1.5[Bi2I9]
Source: Royal Society of Chemistry journal article supplement (doi:10.1039/d4dt02698e), 2024-11-06
Supplement: d4dt02698e1.pdf [file d4dt02698e1.pdf]

**Bulk photovoltaic effect in a zero-dimensional **room-temperature** molecular ferroelectric [C<sub>8</sub>N<sub>2</sub>H<sub>22</sub>]<sub>1.5</sub>[Bi<sub>2</sub>I<sub>9</sub>]**

Zhibo Chen,<sup>a</sup> Tianhong Luo,<sup>a</sup> Jinrong Wen,<sup>a</sup> Zhanqiang Liu,<sup>b</sup> Jingshan Hou,<sup>a</sup>  
Yongzheng Fang\*<sup>a</sup> and Ganghua Zhang\*<sup>a</sup>

<sup>a</sup>*School of Materials Science and Engineering, Shanghai Institute of Technology,  
Shanghai 201418, P. R. China;*

<sup>b</sup>*Department of Materials Chemistry, Huzhou University, 759 East Erhuan Road,  
Huzhou, 313000, P. R. China.*

**E-mail addresses:** ganghuazhang@sit.edu.cn (G.H. Zhang) and fyz1003@sina.com  
(Y.Z. Fang)

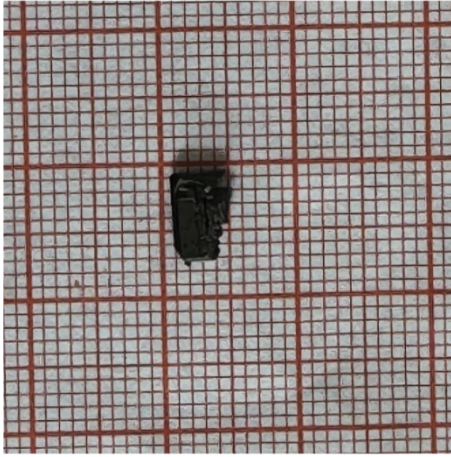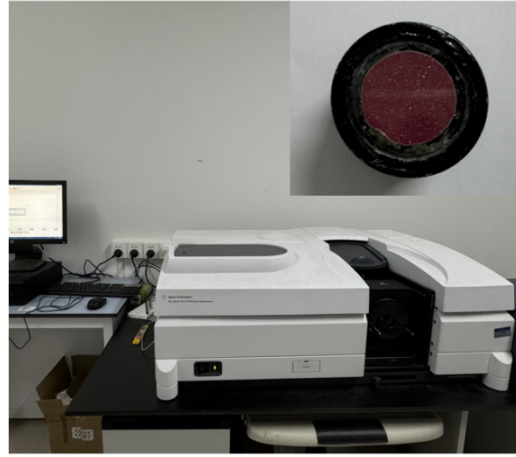

**Fig. S1** Bulk crystal for hysteresis loop tests (a) and the photograph for the UV-Vis measurement (b).

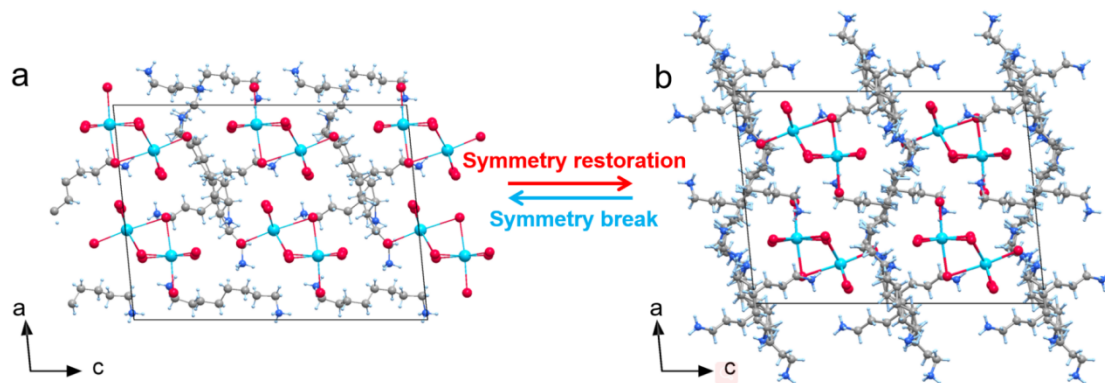

**Fig. S2** Schematic diagram of ferroelectric to paraelectric phase transition in  $[\text{C}_8\text{N}_2\text{H}_{22}]_{1.5}[\text{Bi}_2\text{I}_9]$ .

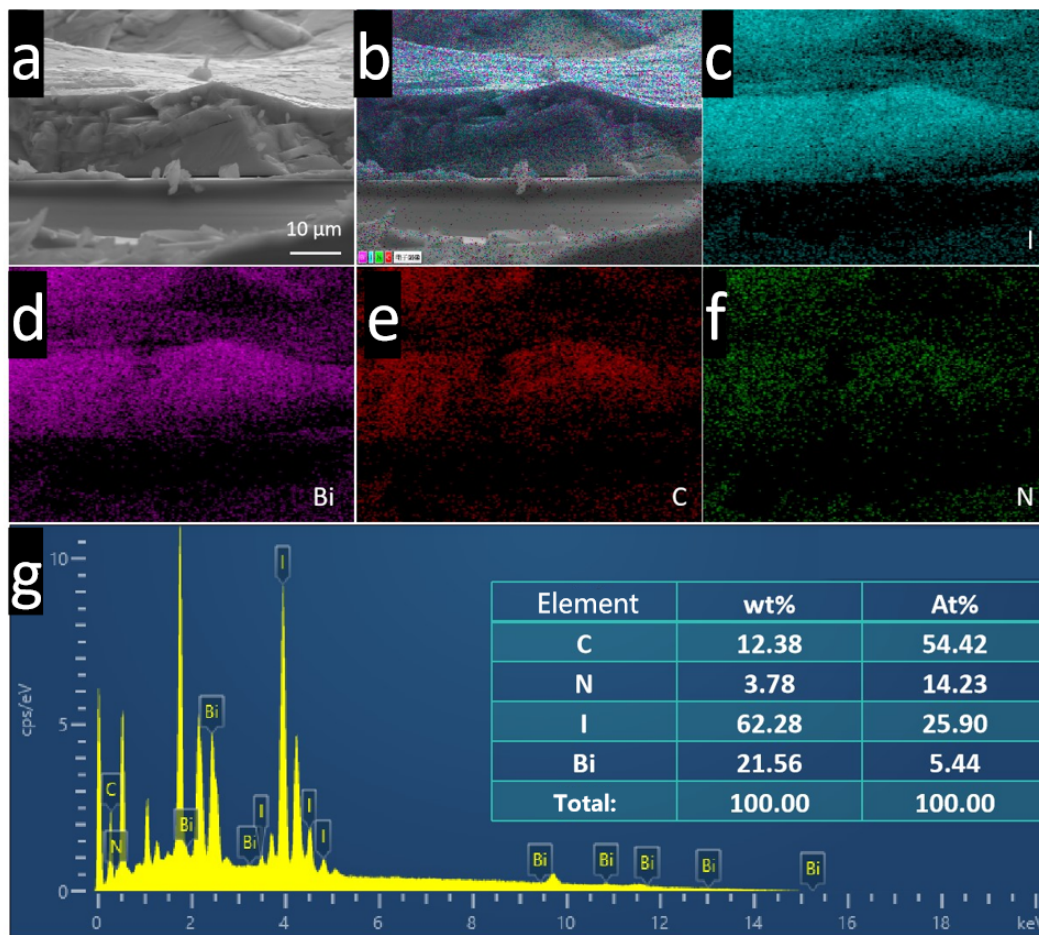

**Fig. S3** Mapping images (a-f) and EDS results (g) of  $[C_8N_2H_{22}]_{1.5}[Bi_2I_9]$  film.

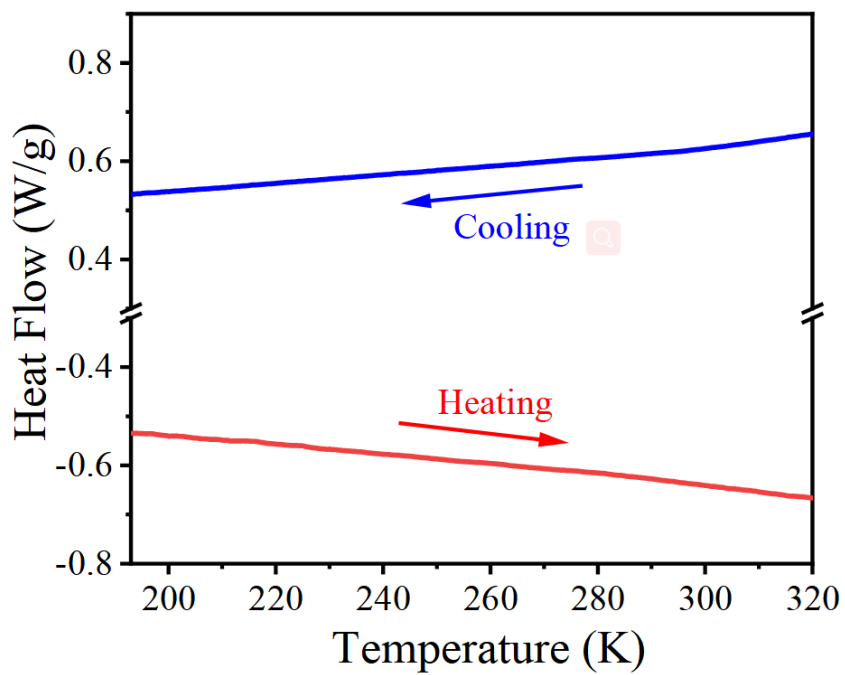

**Fig. S4** Low-temperature DSC curve of  $[\text{C}_8\text{N}_2\text{H}_{22}]_{1.5}[\text{Bi}_2\text{I}_9]$ .

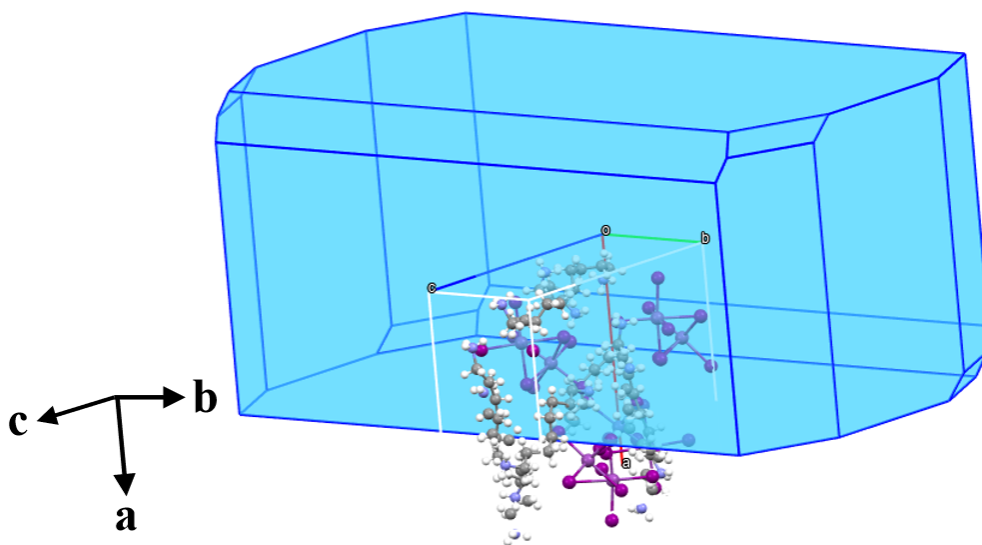

**Fig. S5** Crystal morphology of  $[\text{C}_8\text{N}_2\text{H}_{22}]_{1.5}[\text{Bi}_2\text{I}_9]$  with polarization labeling.

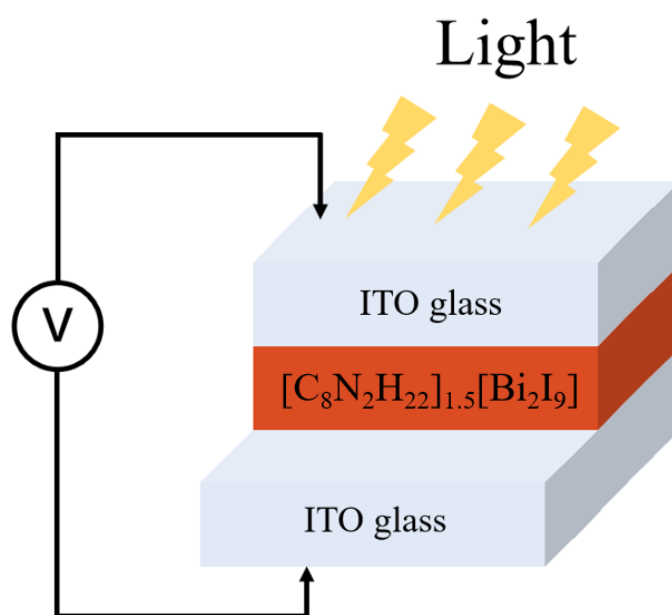

**Fig. S6** Schematically setup of  $[\text{C}_8\text{N}_2\text{H}_{22}]_{1.5}[\text{Bi}_2\text{I}_9]$ -based photoelectric device.

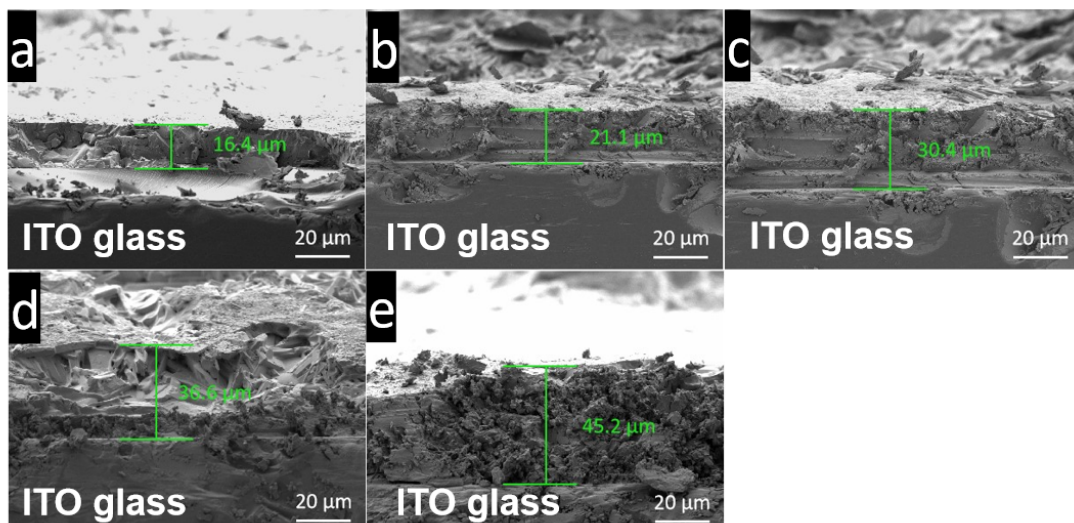

**Fig. S7** Cross-sectional SEM images of  $[\text{C}_8\text{N}_2\text{H}_{22}]_{1.5}[\text{Bi}_2\text{I}_9]/\text{ITO}$  thin films with different thicknesses.



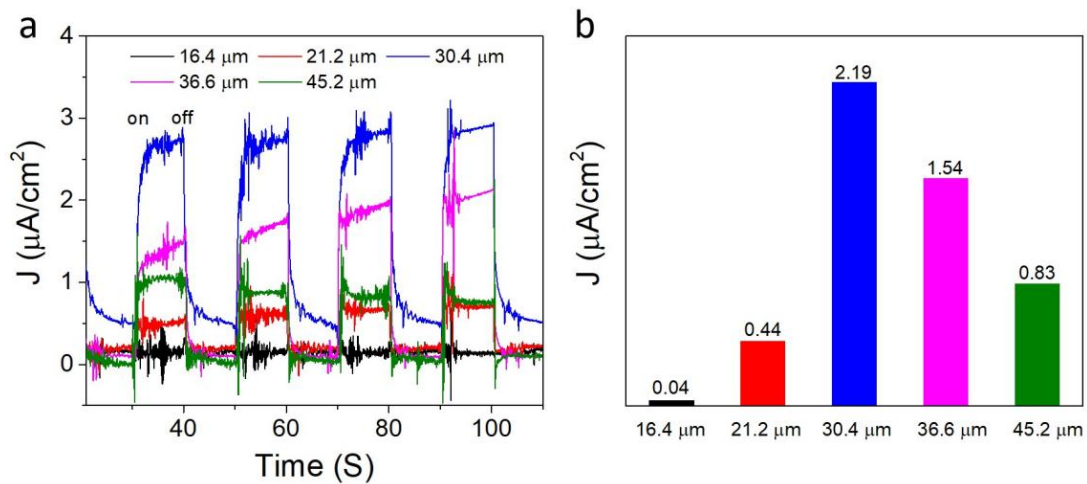

**Fig. S8** (a) Zero-voltage  $J$ - $t$  curves of  $[\text{C}_8\text{N}_2\text{H}_{22}]_{1.5}[\text{Bi}_2\text{I}_9]$ -based photoelectric devices with different thicknesses. (b) Thickness-dependent photocurrent densities of  $[\text{C}_8\text{N}_2\text{H}_{22}]_{1.5}[\text{Bi}_2\text{I}_9]$ -based photoelectric devices

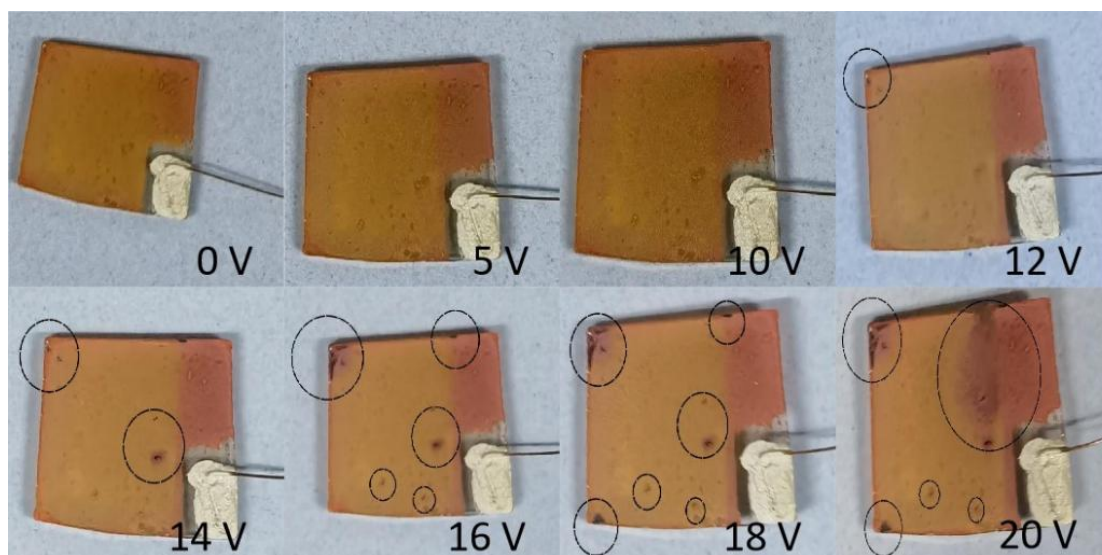

**Fig. S9** Physical appearance of  $[\text{C}_8\text{N}_2\text{H}_{22}]_{1.5}[\text{Bi}_2\text{I}_9]$ -based photoelectric device under different polarization voltages (dashed circles indicate breakdown regions under high polarization voltages).

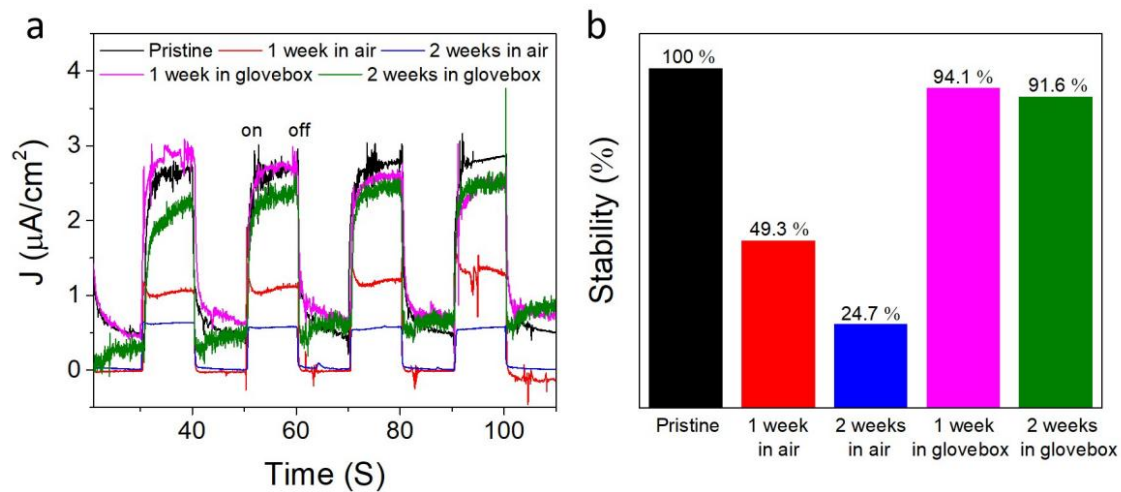

**Fig. S10** (a) Zero-voltage  $J$ - $t$  curves of  $[\text{C}_8\text{N}_2\text{H}_{22}]_{1.5}[\text{Bi}_2\text{I}_9]$ -based photoelectric device after exposing to the atmosphere and glovebox conditions for different time. (b) Corresponding photocurrent degeneration rate over time.

**Table S1.** Atomic coordinates for Bi, N and I in [C<sub>8</sub>N<sub>2</sub>H<sub>22</sub>]<sub>1.5</sub>[Bi<sub>2</sub>I<sub>9</sub>].

| Elements (charge) | Numbers | coordinate               |
|-------------------|---------|--------------------------|
| Bi <sup>3+</sup>  | 8       | (0.5826, 0.5028, 0.5244) |
| N <sup>+</sup>    | 16      | (0.3705, 0.5027, 0.4749) |
| I <sup>-</sup>    | 36      | (0.5422, 0.4988, 0.4780) |

**Point charge model analyses**

According to the crystallographic data of [C<sub>8</sub>N<sub>2</sub>H<sub>22</sub>]<sub>1.5</sub>[Bi<sub>2</sub>I<sub>9</sub>], we select a unit cell and assume that the centers of the positive charges of the cations are located on the N atoms and Bi atoms, the negative charges of the anions are located on the I atoms.

Along *a*-axis

$$\begin{aligned} P_s &= \lim_{V \rightarrow \infty} \frac{1}{V} \sum q_i r_i \\ &= (q_N r_N + q_{Pb} r_{Pb} - q_I r_I) / V \\ &= \left| (0.5826 \times 8 \times 3 + 0.3705 \times 16 - 0.5422 \times 36) \right| \times 1.6 \times 10^{-19} \times 17.5341 \times 10^{-10} / 3557.5 \times 10^{-30} \\ &= 0.00308 \text{ C/cm}^2 \\ |P_s| &= 3.08 \text{ } \mu\text{C/cm}^2 \end{aligned}$$

Along *c*-axis

$$\begin{aligned} P_s &= \lim_{V \rightarrow \infty} \frac{1}{V} \sum q_i r_i \\ &= (q_N r_N + q_{Pb} r_{Pb} - q_I r_I) / V \\ &= \left| (0.5244 \times 8 \times 3 + 0.4749 \times 16 - 0.4780 \times 36) \right| \times 1.6 \times 10^{-19} \times 23.945 \times 10^{-10} / 3557.5 \times 10^{-30} \\ &= 0.0032 \text{ C/cm}^2 \\ |P_s| &= 3.2 \text{ } \mu\text{C/cm}^2 \end{aligned}$$

**Table S2.** Crystallographic data and refinement parameters of  $[\text{C}_8\text{N}_2\text{H}_{22}]_{1.5}[\text{Bi}_2\text{I}_9]$  single crystal at 193 K conditions.

| Empirical formula                              | $[\text{C}_8\text{N}_2\text{H}_{22}]_{1.5}[\text{Bi}_2\text{I}_9]$ |
|------------------------------------------------|--------------------------------------------------------------------|
| Formula weight                                 | 1779.47                                                            |
| Temperature/K                                  | 193.0                                                              |
| Crystal system                                 | monoclinic                                                         |
| Space group                                    | <i>Pc</i>                                                          |
| a/Å                                            | 17.5314(16)                                                        |
| b/Å                                            | 8.5135(8)                                                          |
| c/Å                                            | 23.945(2)                                                          |
| $\alpha/^\circ$                                | 90                                                                 |
| $\beta/^\circ$                                 | 95.581(3)                                                          |
| $\gamma/^\circ$                                | 90                                                                 |
| Volume/Å <sup>3</sup>                          | 3557.5(6)                                                          |
| Z                                              | 2                                                                  |
| $\rho_{\text{calc}}/\text{g}/\text{cm}^3$      | 3.322                                                              |
| $\mu/\text{mm}^{-1}$                           | 17.696                                                             |
| F(000)                                         | 3076.0                                                             |
| Crystal size/ $\text{mm}^3$                    | $0.12 \times 0.08 \times 0.01$                                     |
| Radiation                                      | MoK $\alpha$ ( $\lambda = 0.71073$ )                               |
| 2 $\theta$ range for data collection/ $^\circ$ | 3.948 to 52.744                                                    |
| Index ranges                                   | $-21 \leq h \leq 21, -10 \leq k \leq 9, -29 \leq l \leq 29$        |
| Reflections collected                          | 25936                                                              |
| Independent reflections                        | 13527 [ $R_{\text{int}} = 0.0485, R_{\text{sigma}} = 0.0670$ ]     |
| Data/restraints/parameters                     | 13527/665/566                                                      |
| Goodness-of-fit on $F^2$                       | 1.019                                                              |
| Final R indexes [ $I \geq 2\sigma(I)$ ]        | $R_1 = 0.0468, wR_2 = 0.1139$                                      |
| Final R indexes [all data]                     | $R_1 = 0.0678, wR_2 = 0.1299$                                      |
| Largest diff. peak/hole / $e \text{ \AA}^{-3}$ | 1.77/-1.61                                                         |
